# Supplementary material for: Dynamic Forecasting of Zika Epidemics Using Google Trends
Source: PLoS One. 2017 Jan 6;12(1):e0165085. doi: 10.1371/journal.pone.0165085 (PMC5217860; doi:10.1371/journal.pone.0165085)
Supplement: S1 Table — The search region is set to ‘Worldwide’ and the key wrod is the ‘Zika’. (XLSX) [file pone.0165085.s001.xlsx]

## Sheet: Sheet1
Date	Daily GT Volume: (Worldwide)
2016-02-12	100
2016-02-13	89
2016-02-14	74
2016-02-15	80
2016-02-16	85
2016-02-17	82
2016-02-18	76
2016-02-19	73
2016-02-20	61
2016-02-21	55
2016-02-22	63
2016-02-23	66
2016-02-24	68
2016-02-25	68
2016-02-26	58
2016-02-27	58
2016-02-28	51
2016-02-29	53
2016-03-01	62
2016-03-02	57
2016-03-03	56
2016-03-04	49
2016-03-05	44
2016-03-06	40
2016-03-07	50
2016-03-08	53
2016-03-09	55
2016-03-10	52
2016-03-11	45
2016-03-12	36
2016-03-13	36
2016-03-14	46
2016-03-15	42
2016-03-16	40
2016-03-17	35
2016-03-18	33
2016-03-19	28
2016-03-20	29
2016-03-21	34
2016-03-22	34
2016-03-23	32
2016-03-24	32
2016-03-25	29
2016-03-26	29
2016-03-27	29
2016-03-28	34
2016-03-29	35
2016-03-30	34
2016-03-31	34
2016-04-01	32
2016-04-02	27
2016-04-03	26
2016-04-04	31
2016-04-05	43
2016-04-06	40
2016-04-07	38
2016-04-08	32
2016-04-09	26
2016-04-10	26
2016-04-11	43
2016-04-12	63
2016-04-13	49
2016-04-14	53
2016-04-15	39
2016-04-16	31
2016-04-17	33
2016-04-18	35
2016-04-19	36
2016-04-20	32
2016-04-21	33
2016-04-22	31
2016-04-23	26
2016-04-24	24
2016-04-25	32
2016-04-26	31
2016-04-27	29
2016-04-28	28
2016-04-29	30
2016-04-30	27
2016-05-01	25
2016-05-02	29
2016-05-03	27
2016-05-04	28
2016-05-05	27
2016-05-06	31
2016-05-07	29
2016-05-08	25
2016-05-09	27
2016-05-10	28
2016-05-11	31
2016-05-12	31
2016-05-13	32
2016-05-14	25
2016-05-15	24
2016-05-16	27
2016-05-17	31
2016-05-18	35
2016-05-19	32
2016-05-20	40
2016-05-21	35
2016-05-22	28
2016-05-23	31
2016-05-24	34
2016-05-25	29
2016-05-26	28
2016-05-27	30
2016-05-28	46
2016-05-29	32
2016-05-30	36
2016-05-31	38
2016-06-01	56
2016-06-02	43
2016-06-03	38
2016-06-04	34
2016-06-05	31
2016-06-06	33
2016-06-07	33
2016-06-08	33
2016-06-09	30
2016-06-10	32
2016-06-11	28
2016-06-12	27
2016-06-13	24
2016-06-14	24
2016-06-15	24
2016-06-16	25
2016-06-17	28
2016-06-18	26
2016-06-19	24
2016-06-20	25
2016-06-21	27
2016-06-22	34
2016-06-23	33
2016-06-24	25
2016-06-25	26
2016-06-26	27
2016-06-27	25
2016-06-28	32
2016-06-29	32
2016-06-30	29
2016-07-01	27
2016-07-02	24
2016-07-03	23
2016-07-04	24
2016-07-05	26
2016-07-06	28
2016-07-07	24
2016-07-08	23
2016-07-09	27
2016-07-10	22
2016-07-11	24
2016-07-12	26
2016-07-13	24
2016-07-14	24
2016-07-15	27
2016-07-16	28
2016-07-17	24
2016-07-18	25
2016-07-19	26
2016-07-20	28
2016-07-21	27
2016-07-22	28
2016-07-23	24
2016-07-24	21
2016-07-25	32
2016-07-26	31
2016-07-27	24
2016-07-28	26
2016-07-29	60
2016-07-30	62
2016-07-31	47
2016-08-01	65
2016-08-02	91
2016-08-03	71
2016-08-04	75
2016-08-05	67
2016-08-06	67
2016-08-07	54
2016-08-08	46
2016-08-09	48
2016-08-10	46
2016-08-11	37
2016-08-12	39
2016-08-13	45
2016-08-14	36
2016-08-15	35
2016-08-16	36
2016-08-17	36
2016-08-18	35
2016-08-19	52
2016-08-20	52
2016-08-21	38
2016-08-22	44
2016-08-23	47
2016-08-24	47
2016-08-25	41
2016-08-26	43
2016-08-27	40
2016-08-28	47
2016-08-29	53
2016-08-30	52
2016-08-31	57
2016-09-01	84
2016-09-02	72
2016-09-03	54
2016-09-04	44
2016-09-05	48
2016-09-06	46
2016-09-07	51
2016-09-08	43
2016-09-09	39
2016-09-10	33
2016-09-11	31
2016-09-12	33
2016-09-13	35
2016-09-14	34
2016-09-15	30
2016-09-16	28
2016-09-17	25
2016-09-18	24
2016-09-19	27
2016-09-20	27
2016-09-21	24
2016-09-22	23
2016-09-23	21
2016-09-24	17
2016-09-25	19
2016-09-26	22
2016-09-27	21
2016-09-28	19
2016-09-29	21
2016-09-30	23
2016-10-01	18
2016-10-02	17
2016-10-03	19
2016-10-04	19
2016-10-05	19
2016-10-06	18
2016-10-07	16
2016-10-08	14
2016-10-09	15
2016-10-10	16
2016-10-11	18
2016-10-12	17
2016-10-13	16
2016-10-14	18
2016-10-15	15
2016-10-16	15
2016-10-17	17
2016-10-18	17
2016-10-19	17
2016-10-20	17
2016-10-21	15
2016-10-22	13
2016-10-23	13
2016-10-24	15
2016-10-25	15
2016-10-26	16
2016-10-27	14
2016-10-28	13
2016-10-29	11
2016-10-30	13
2016-10-31	15
2016-11-01	15
2016-11-02	15
2016-11-03	15
2016-11-04	15
2016-11-05	13
2016-11-06	15
2016-11-07	20
2016-11-08	14
2016-11-09	12
