# Supplementary material for: Dynamic Forecasting of Zika Epidemics Using Google Trends
Source: PLoS One. 2017 Jan 6;12(1):e0165085. doi: 10.1371/journal.pone.0165085 (PMC5217860; doi:10.1371/journal.pone.0165085)
Supplement: S2 Table — (XLSX) [file pone.0165085.s002.xlsx]

## Sheet: Sheet1
EPS Week (Year)	Confirmed Cases	Suspected Cases	Total Cases	Cumulative Google Trends Volumes
6	2048	118208	120256	637
7	2601	128087	130688	1123
8	2765	134460	137225	1577
9	2943	144290	147233	1972
10	3542	170683	174225	2315
11	4072	180493	184565	2595
12	4629	187473	192102	2817
13	4883	194618	199501	3041
14	5869	199922	205791	3278
15	6560	207312	213872	3570
16	7698	225088	232786	3809
17	7982	256076	264058	4010
18	8672	289233	297905	4203
19	8670	298488	307158	4405
20	40479	269876	310355	4611
21	42399	287265	329664	4836
22	52003	363990	415993	5117
23	52827	363344	416171	5349
24	53473	381726	435199	5533
25	56350	398626	454976	5755
28	82559	423160	505719	6272
29	87542	432693	520235	6457
30	89502	436142	525644	6643
31	91692	444884	536576	7181
32	106252	457894	564146	7479
33	107888	460496	568384	7741
34	111333	466815	578148	8062
35	113376	492820	606196	8438
36	116122	494784	610906	8796
37	118276	497715	615991	9031
38	120785	500557	621342	9209
39	147075	503548	650623	9349
40	149703	504537	654240	9482
41	153322	507851	661173	9594
42	164352	512345	676697	9710
43	166010	514757	680767	9811
44	168258	515348	683606	9908
45	169865	515969	685834	9997
