# Supplementary material for: Dynamic Forecasting of Zika Epidemics Using Google Trends
Source: PLoS One. 2017 Jan 6;12(1):e0165085. doi: 10.1371/journal.pone.0165085 (PMC5217860; doi:10.1371/journal.pone.0165085)
Supplement: S3 Table — (XLSX) [file pone.0165085.s003.xlsx]

## Sheet: Sheet1
Model	Confirmed Case			Suspected Case			Confirmed and Suspected Case
	Ljung-Box Q statistic	P Value	AIC	Ljung-Box Q statistic	P Value	AIC	Ljung-Box Q statistic	P Value	AIC
ARIMA(0,1,3)	10.87	0.762	528.59	8.58	0.8984	566.66	15.6	0.409	570.98
ARIMA(1,0,3)	11.99	0.6796	573.5	10.27	0.8025	612.96	15.77	0.3972	619.14
ARIMA(0,1,2)	11.06	0.7483	526.74	8.59	0.8982	564.67	16.19	0.3698	569.18
ARIMA(0,1,4)	8.9	0.8827	530.03	6.4331	0.9715	567.58	12.28	0.6581	567
ARIMA(1,0,2)	12.17	0.6658	571.53	10.26	0.8031	610.96	16.48	0.3511	617.34
Linear Regression Model	-	-	844.47	-	-	891.3	-	-	897.64
