# Supplementary material for: Dynamic Forecasting of Zika Epidemics Using Google Trends
Source: PLoS One. 2017 Jan 6;12(1):e0165085. doi: 10.1371/journal.pone.0165085 (PMC5217860; doi:10.1371/journal.pone.0165085)
Supplement: S4 Table — (XLSX) [file pone.0165085.s004.xlsx]

## Sheet: Sheet1
Date	Confirmed Cases		Suspected Cases		Total Cases
	Model Predictions	Reported Cases	Model Predictions	Reported Cases	Model Predictions	Reported Cases
2016-10-27	166101.1 (95% CI: 157832.8 - 174369.4)	166010	516170.9 (95% CI: 501099.3 - 531242.5)	514757	683369.9 (95% CI: 666435.4 - 700304.4)	680767
2016-11-03	168385.5 (95% CI: 156552.0 - 180219.0)	168258	520665.2 (95% CI: 498423.2 - 542907.3)	515348	688619.4 (95% CI: 663747.7 - 713491.1)	683606
2016-11-09	169722.4 (95% CI: 154746.8 - 184698.0)	169865	524231.6 (95% CI: 498863.8 - 549599.4)	515969	693106.0 (95% CI: 662396.1 - 723815.9)	685834
